# Supplementary material
Source: PubMed Central journal article supplement (PMC3198145)

Number of patients

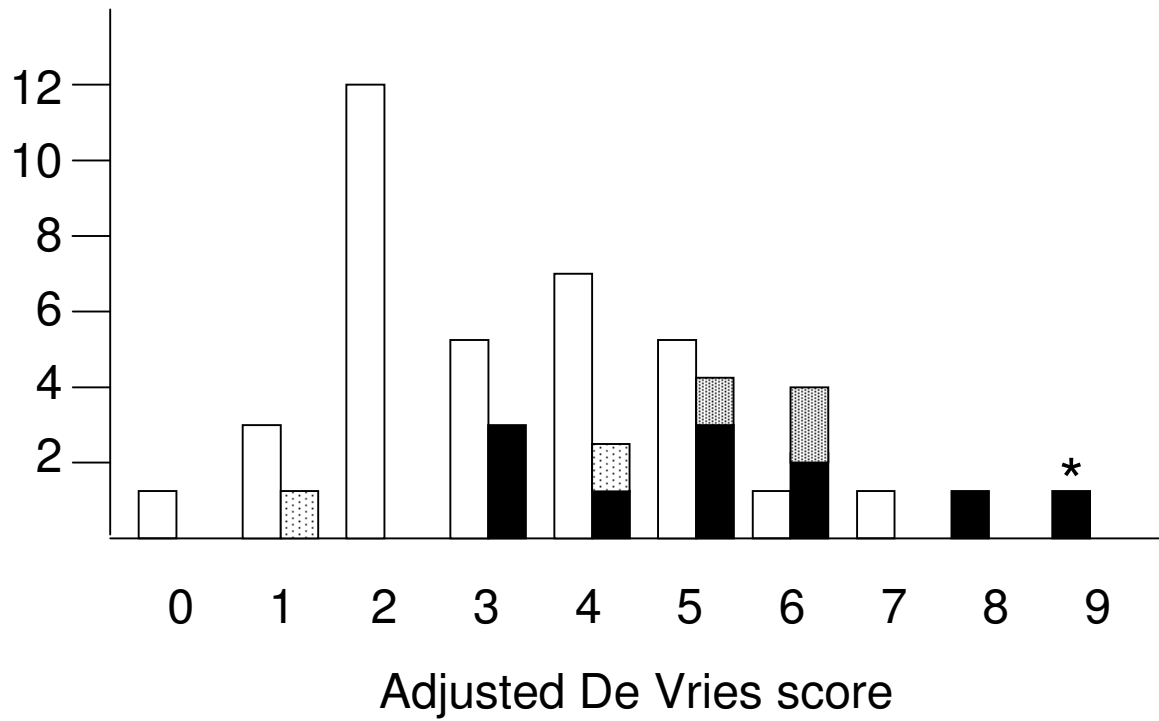

Supplement: ejhg2011120x1.pdf [file ejhg2011120x1.pdf]
